# Supplementary material for: Protonated Organic Diamines as Templates for Layered and Microporous Structures: Synthesis, Crystal Chemistry, and Structural Trends among the Compounds Formed in Aqueous Systems Transition Metal Halide or Nitrate–Diamine–Selenious Acid
Source: MDPI journal article supplement (doi:10.3390/ijms241814202), 2023-09-17
Supplement: s1 [file s1]

**Table S1.** Crystallographic data for known hydrogen selenites with organic molecules.

| Chemical formula                                                                                                           | Space group                                          | <i>a</i> , Å | <i>α</i> , ° | <i>b</i> , Å | <i>β</i> , ° | <i>c</i> , Å | <i>γ</i> , ° | Reference                     |
|----------------------------------------------------------------------------------------------------------------------------|------------------------------------------------------|--------------|--------------|--------------|--------------|--------------|--------------|-------------------------------|
| [C <sub>6</sub> H <sub>15</sub> N <sub>4</sub> O <sub>2</sub> ][HSeO <sub>3</sub> ] 0.15(H <sub>2</sub> O)                 | <i>C2</i>                                            | 22.493(5)    |              | 5.1624(13)   | 95.68(3)     | 9.730(4)     |              | Matos Gomes et al., 2001 [17] |
| [C <sub>9</sub> H <sub>12</sub> NO <sub>2</sub> ][C <sub>9</sub> H <sub>11</sub> NO <sub>2</sub> ][HSeO <sub>3</sub> ]     | <i>P1</i>                                            | 11.0507(4)   | 107.867(2)   | 12.8611(5)   | 110.392(2)   | 15.8820(6)   | 90.017(2)    | Gharzaryan et al., 2010 [3]   |
| [C <sub>8</sub> H <sub>20</sub> N][HSeO <sub>3</sub> ]                                                                     | <i>P-1</i>                                           | 7.926(6)     | 80.64(1)     | 8.909(7)     | 65.15(1)     | 9.146(7)     | 77.19(2)     | Wang et al., 2006 [18]        |
| [C <sub>2</sub> H <sub>7</sub> N <sub>4</sub> O][HSeO <sub>3</sub> ]                                                       | <i>P-1</i>                                           | 6.7643(4)    | 63.021(1)    | 7.9045(5)    | 81.414(1)    | 8.2612(5)    | 72.200(1)    | Ritchie et al., 2003 [13]     |
| [CH <sub>6</sub> N <sub>3</sub> ][HSeO <sub>3</sub> ]                                                                      | <i>P2</i> <sub>1</sub>                               | 4.145(2)     |              | 7.851(3)     | 98.77(3)     | 9.154(4)     |              | Krumbe et al., 1987 [5]       |
| [HSeO <sub>3</sub> ][C <sub>2</sub> H <sub>6</sub> NO <sub>2</sub> ][C <sub>2</sub> H <sub>5</sub> NO <sub>2</sub> ]       | <i>P2</i> <sub>1</sub> / <i>c</i>                    | 12.2651(7)   |              | 4.8079(6)    | 122.745(4)   | 19.955(1)    |              | Nemec et al., 1998 [7]        |
| [C <sub>11</sub> H <sub>13</sub> N <sub>2</sub> O <sub>2</sub> ][HSeO <sub>3</sub> ]                                       | <i>P2</i> <sub>1</sub> 2 <sub>1</sub> 2 <sub>1</sub> | 5.4406(6)    |              | 8.2436(6)    |              | 27.539(3)    |              | Paixao et al., 2006 [11]      |
| [C <sub>7</sub> H <sub>8</sub> NO <sub>2</sub> ][HSeO <sub>3</sub> ][H <sub>2</sub> O]                                     | <i>P-1</i>                                           | 4.6718(6)    | 104.395(12)  | 9.3967(15)   | 92.705(11)   | 12.7992(14)  | 103.109(13)  | Kamali et al., 2018 [4]       |
| [C <sub>13</sub> H <sub>14</sub> N <sub>3</sub> ][HSeO <sub>3</sub> ][H <sub>2</sub> O]                                    | <i>P2</i> <sub>1</sub> / <i>n</i>                    | 6.360(1)     |              | 19.272(2)    | 93.75(1)     | 12.604(2)    |              | Paixao et al., 1997 [12]      |
| [C <sub>6</sub> H <sub>8</sub> N][HSeO <sub>3</sub> ][H <sub>2</sub> O]                                                    | <i>P-1</i>                                           | 4.7212(2)    | 107.297(3)   | 9.3681(3)    | 92.294(3)    | 11.1290(3)   | 103.549(3)   | Takouachet et al., 2016 [14]  |
| [C <sub>6</sub> H <sub>8</sub> N][HSeO <sub>3</sub> ][H <sub>2</sub> O]                                                    | <i>P1</i>                                            | 4.7423(3)    | 107.271(6)   | 9.4263(8)    | 92.652(6)    | 11.1599(7)   | 103.370(7)   | Takouachet et al., 2016 [14]  |
| [C <sub>20</sub> H <sub>15</sub> N <sub>4</sub> ][HSeO <sub>3</sub> ] 2(H <sub>2</sub> O)                                  | <i>P2</i> <sub>1</sub> / <i>c</i>                    | 18.708(2)    |              | 14.320(1)    | 92.89(1)     | 7.349(3)     |              | Chen et al., 2010 [2]         |
| [C <sub>4</sub> H <sub>6</sub> N <sub>3</sub> O][HSeO <sub>3</sub> ]                                                       | <i>Pca</i> 2 <sub>1</sub>                            | 7.0051(3)    |              | 8.6342(2)    |              | 12.7131(3)   |              | Takouachet et al., 2014 [15]  |
| [C <sub>6</sub> H <sub>16</sub> N <sub>2</sub> ][HSeO <sub>3</sub> ]                                                       | <i>Pbcn</i>                                          | 14.682(2)    |              | 6.491(1)     |              | 13.065(2)    |              | Nemec et al., 2001 [8]        |
| [C <sub>6</sub> H <sub>16</sub> NO <sub>3</sub> ][HSeO <sub>3</sub> ]                                                      | <i>P2</i> <sub>1</sub>                               | 8.043(1)     |              | 5.3468(9)    | 93.66(1)     | 12.543(2)    |              | Lukevics et al., 2002 [6]     |
| [C <sub>36</sub> H <sub>30</sub> NP <sub>2</sub> ][HSeO <sub>3</sub> ][CH <sub>2</sub> Cl <sub>2</sub> ][H <sub>2</sub> O] | <i>P2</i> <sub>1</sub> / <i>c</i>                    | 10.8664(11)  |              | 12.6743(13)  | 95.727(2)    | 26.029(3)    |              | Canossa et al., 2018 [1]      |
| [C <sub>10</sub> H <sub>16</sub> N][HSeO <sub>3</sub> ][H <sub>2</sub> SeO <sub>3</sub> ]                                  | <i>Pbca</i>                                          | 9.840(1)     |              | 24.416(5)    |              | 12.2489(8)   |              | Matos Gomes et al., 1995 [16] |
| [C <sub>5</sub> H <sub>11</sub> NO <sub>2</sub> ][HSeO <sub>3</sub> ]                                                      | <i>Fdd</i> 2                                         | 28.042(2)    |              | 21.815(2)    |              | 6.073(2)     |              | Paixao et al., 1997 [11]      |
| [C <sub>2</sub> H <sub>5</sub> NO <sub>2</sub> ][HSeO <sub>3</sub> ]                                                       | <i>P2</i> <sub>1</sub> / <i>n</i>                    | 5.049(1)     |              | 13.677(2)    | 94.92(1)     | 8.664(1)     |              | Ondracek et al., 1992 [9]     |
| [C <sub>10</sub> H <sub>16</sub> N][HSeO <sub>3</sub> ][H <sub>2</sub> SeO <sub>3</sub> ]                                  | <i>Pbca</i>                                          | 9.840(1)     |              | 24.416(5)    |              | 12.2489(8)   |              | Matos Gomes et al., 1995 [16] |

## References

1. Canossa S., Graiff C. Role of Bis(triphenylphosphine)iminium Cation [PNP]<sup>+</sup> on the Crystal Packing of [PNP]<sup>+</sup>[HSeO<sub>3</sub>]<sup>-</sup> Solvate Salt. *Crystals* **2018**, *8*, 151.
2. Chen H., Gao W., Zhu M., Gao H., Xue J., Li Y. A highly selective OFF–ON fluorescent sensor for zinc in aqueous solution and living cells. *Chem. Commun.* **2010**, *46*, 8389–8391.
3. Gharzaryan V.V., Fleck M., Petrosyan A.M. New salts of amino acids with dimeric cations. *Proceedings of SPIE - International Conference on Laser Physics 2010*, **2011**, 7998, 79980F.
4. Kamali N., O'Malley C., Mahon M.F., Erxleben A., McArdle P. Use of Sublimation Catalysis and Polycrystalline Powder Templates for Polymorph Control of Gas Phase Crystallization. *Cryst. Growth Des.* **2018**, *18*, 3510–3516.
5. Krumbe W., Haussuhl S. Structure and physical properties of orthorhombic guanidinium phthalate, [CN<sub>3</sub>H<sub>6</sub>]<sub>2</sub>C<sub>8</sub>H<sub>4</sub>O<sub>4</sub>, and guanidinium hydrogen L-aspartate, [CN<sub>3</sub>H<sub>6</sub>]<sub>2</sub>C<sub>4</sub>H<sub>6</sub>NO<sub>4</sub>. *Z. Kristallogr. Cryst. Mater.* **1987**, *179*, 267–279.
6. Lukevics E., Arsenyan P., Shestakova I., Domracheva I., Kanepe I., Belyakov S., Popelis J., Pudova O. Synthesis, structure and cytotoxicity of organoammonium selenites. *Appl. Organomet. Chem.* **2002**, *16*, 228–234.
7. Nemec I., Cisarova I., Micka Z. Study of the family of glycine-selenious acid addition compounds: Crystal structure of diglycine hydrogen selenite and vibrational spectra and DSC measurement of diglycine hydrogen selenite and monoglycine-selenious acid crystals. *J. Solid State Chem.* **1998**, *140*, 71–82.
8. Nemec I., Chudoba V., Havlicek D., Cisarova I., Micka Z. Preparation, Crystal Structure, Vibrational Spectra, and Thermal Behavior of N,N'-Dimethylpiperazinium(2+) Hydrogen Selenite. *J. Solid State Chem.* **2001**, *161*, 312–318.
9. Ondracek J., Walzelova M., Micka Z., Novotny J. Structure of glycine-selenious acid (1/1). *Acta Crystallogr.* **1992**, *C48*, 391–392.
10. Paixao J.A., Matos Beja A., Ramos Silva M., Alte da Veiga L., Martin-Gil J., Martin-Gil F., de Matos Gomes E. Crystal structure of betaine dihydrogen selenite, C<sub>5</sub>H<sub>13</sub>NO<sub>5</sub>Se. *Z. Kristallogr. New Cryst. Struct.* **1997**, *212*, 51–52.
11. Paixao J.A., Silva M.R., Beja A.M. Crystal structure and properties of L-tryptophanium hydrogen selenite. Eusebio E. *Polyhedron* **2006**, *25*, 2021–2025.
12. Paixao J.A., Matos Beja A., Ramos Silva M., de Matos Gomes E., Martin-Gil J., Martin-Gil F.J. N,N'-diphenylguanidinium hydrogenselenite monohydrate. *Acta Crystallogr.* **1997**, *C591*, 1113–1115.
13. Ritchie L.K., Harrison W.T.A. 1-Carbamoylguanidinium hydrogenselenite. *Acta Crystallogr.* **2003**, *E59*, o1296–o1298.
14. Takouachet R., Benali-Cherif R., Bendeif E.-E., Benali-Cherif N., Pillet S., Schaniel D. Structural analysis and IR-spectroscopy of a new anilinium hydrogenselenite hybrid compound: A subtle structural phase transition. *Inorg. Chim. Acta* **2016**, *446*, 6–12.
15. Takouachet R., Benali-Cherif R., Benali-Cherif N. Cytosinium hydrogen selenite. *Acta Crystallogr.* **2014**, *E70*, o186–o187.
16. de Matos Gomes E., Matos Beja A., Paixao J.A., de Veiga L.A., Ramos Silva M., Martin-Gil J., Martin-Gil F.J. Synthesis, structure and thermal behavior of benzyltrimethylammonium trihydrogen selenite. *Z. Kristallogr. Cryst. Mater.* **1995**, *210*, 929–933.

17. de Matos Gomes E., Nogueira E., Fernandes I., Belsley M., Paixao J.A., Matos Beja A., Ramos Silva M., Martin-Gil J., Martin-Gil F., Mano J.F. Synthesis, structure, thermal and non-linear optical properties of L-argininium hydrogen selenite. *Acta Crystallogr.* **2001**, B57, 828–832.
18. Wang J.-J., Tessier C., Holm R.H. Analogue reaction systems of selenate reductase. *Inorg. Chem.* **2006**, 45, 2979–2988.
